# Supplementary material
Source: publisher site journal article supplement (https://www.spandidos-publications.com/5768/downloadSupplementary)
Supplement: Supplementary file 1 [file downloadSupplementary]

## Sheet: Sheet1
Table SI. Exploring the mechanism of resistance to vincristine in breast cancer cells through transcriptome sequencing technology.
Primer	Name	Sequence
1	DUSP9-Q-F	ACTGGGCATCCGCTACATCC
2	DUSP9-Q-R	CCCGCAGTTCTGGGACAAGG
3	CACNG6-Q-F	AGCTCAACACCTACAAGGCC
4	CACNG6-Q-R	TGAAAGATGCGTGCATTCTC
5	CACNG7-Q-F	GTGCTACCGCAGAACCAGAC
6	CACNG7-Q-R	ATTCTCCGTGTTTTCCGTCA
7	MAPK11-Q-F	AGAAGGTGGCGGTGAAGAAG
8	MAPK11-Q-R	GACGTCCAGAAGCCCGATGA
9	DUSP2-Q-F	AGCCGTCCTCAACGTGTCCG
10	DUSP2-Q-R	GCCTCCGCTGTTCTTCACCC
11	VEGFA-Q-F	CCAATCGAGACCCTGGTGGA
12	VEGFA-Q-R	ATGTGCTGGCCTTGGTGAGG
13	IL1A-Q-F	GACGCCCTCAATCAAAGTAT
14	IL1A-Q-R	TCATCTTGGGCAGTCACATA
15	IL1B-Q-F	CCTGCGTGTTGAAAGATGAT
16	IL1B-Q-R	CAAATTCCAGCTTGTTATTG
17	IL1R1-Q-F	GCCAGTTGAGTGACATTGCT
18	IL1R1-Q-R	GATGAGGGTACTCCTTCTTT
19	DDIT3-Q-F	TGGGAGCTGGAAGCCTGGTA
20	DDIT3-Q-R	GGCTCTGGGAGGTGCTTGTG
21	GAPDH-Q-F	ATGGGGAAGGTGAAGGTCG
22	GAPDH-Q-R	GGGGTCATTGATGGCAACAATA
